# Supplementary material for: Proof of Gene Doping in a Mouse Model with a Human Erythropoietin Gene Transferred Using an Adenoviral Vector
Source: Preprints.org preprint supplement (doi:10.20944/preprints202107.0034.v1), 2021-07-01
Supplement: Supplementary file 1 [file supplementary]

## Sheet: Sheet1
			Targets		Sequences	Predicted amplicon size
				Forward
				Probe
				Reverse
				Forward
				Probe
				Reverse
				Forward
				Probe
				Reverse
				Forward
				Probe
				Reverse
				Forward
				Probe
				Reverse
				Forward
				Reverse
				Forward
				Reverse
				Forward
				Reverse

## Sheet: Sheet2
			Table S1. Primer and probe sequences
			Assays	Types	Targets		Sequences	Predicted amplicon size (bp)
			TaqMan-qPCR	Direct proof of gene doping	hEPO-1	Forward	CATCTGTGACAGCCGAGTCC	290
						Probe	56-FAM/TG AGA ATA T/ZEN/C ACT GTC CCA GAC ACC /3IABkFQ
						Reverse	AGGCCACTGACGGCTTTATC
					hEPO-2	Forward	GCTGCATGTGGATAAAGCCG	158
						Probe	56-FAM/AG CCC AGA A/ZEN/G GAA GCC ATC TC/3IABkFQ
						Reverse	AGACTCGGAAGAGTTTGCGG
					TkpA	Forward	ACAATACCGGAAGGAACCCG	128
						Probe	56-FAM/AT AAA ACG C/ZEN/A CGG GTG TTG G/3IABkFQ
						Reverse	GGGTATCGACAGAGTGCCAG
					CMVp	Forward	ACCATGGTGATGCGGTTTTG	159
						Probe	56-FAM/AT AGC GGT T/ZEN/T GAC TCA CGG G/3IABkFQ
						Reverse	CAATGGGGCGGAGTTGTTAC
					Hexon	Forward	GATGTCAGCCTTGCCTACGA	117
						Probe	56-FAM/AT AGC GGT T/ZEN/T GAC TCA CGG G/3IABkFQ
						Reverse	CACGGCAAATACGGGGTAGA
			TB Green-qPCR	Hematopoietic markers	Gata1	Forward	CAAGCTCCATCAGGTGAACCG	102
						Reverse	TTCGACCCCCGCTTCTTTTT
					Vegfa	Forward	CGGGCCTCGGTTCCA	200
						Reverse	GCAGCCTGGGACCACTTG
					Vegfb	Forward	TGAAGCCAGACAGGGTTGC	102
						Reverse	TGAAGCCAGACAGGGTTGC
					Trfr	Forward	GTGGAGTCTCCCGAGGGTTA	179
						Reverse	TGGGCATTTGCAACCTTTTCT
					Gypa	Forward	CACACATTGGAGGAATGCCG	177
						Reverse	TGTCACCACCCTCAGGAGAT
				Indirect proof of gene doping	Gm32051	Forward	AGCTACAAACAAGGAAGCCGA	147
						Reverse	TGTCACAACAACATGGCTGC
					Mthfd2	Forward	TTCAGCATCCACTCTCGGTG	128
						Reverse	TGAAAGCTTAAACGGGTGGC
					Apol11b	Forward	CGCCACGGAAGATTTAATAACAGAT	105
						Reverse	GCTTCTCCCTCCTCGCTTGA
					Isg15	Forward	TCTGACTGTGAGAGCAAGCAG	92
						Reverse	ACCTTTAGGTCCCAGGCCATT
				Normalizer	18s rRNA	Forward	AACTTTCGATGGTAGTCGCCG	105
						Reverse	CCTTGGATGTGGTAGCCGTTT
