# Supplementary material for: Proof of Gene Doping in a Mouse Model with a Human Erythropoietin Gene Transferred Using an Adenoviral Vector
Source: Preprints.org preprint supplement (doi:10.20944/preprints202107.0034.v1), 2021-07-01
Supplement: Supplementary file 2 [file supplementary]

Archive with 2 entries (2 files):
- 20210622ver._Supplementary_Figure_S1-5.pdf
- Supplementary Table_S1.xlsx
